# Supplementary figures and images for: Exosomes derived from M2-type microglia ameliorate oxygen-glucose deprivation/reoxygenation-induced HT22 cell injury by regulating miR-124-3p/NCOA4-mediated ferroptosis
Source: PubMed Central journal article supplement — Heliyon. 2023 Jun 28;9(7):e17592. doi: 10.1016/j.heliyon.2023.e17592 (PMC10328844; doi:10.1016/j.heliyon.2023.e17592), 2023-06-28

Fig 3G

NCOA4

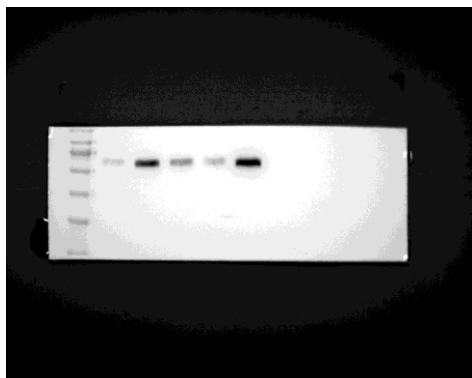

GAPDH

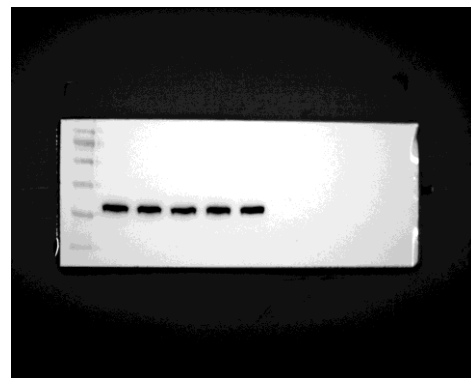

Fig 4B

NCOA4

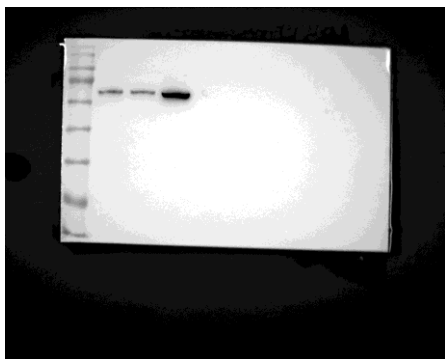

GAPDH

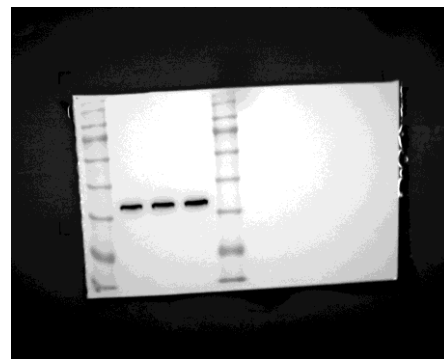

Fig 4F

NCOA4

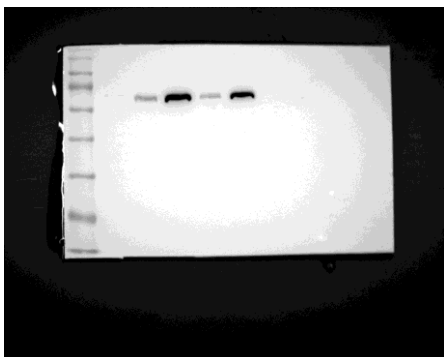

GAPDH

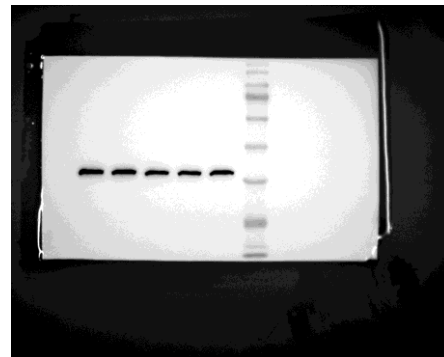

Fig 5B

NCOA4

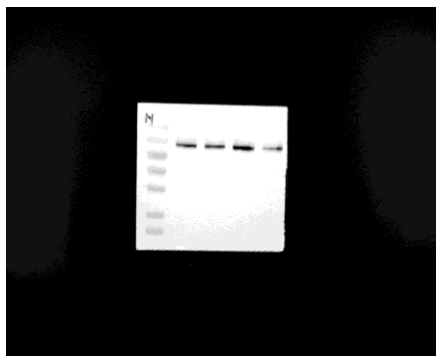

GAPDH

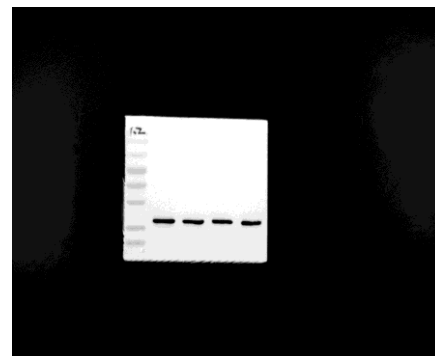

TSG101

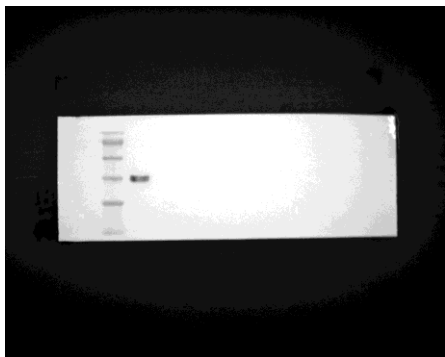

CD63

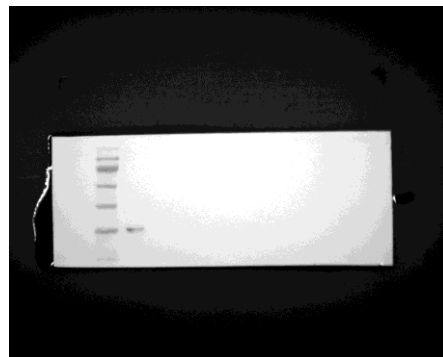

Supplement: mmc1.pdf [file mmc1.pdf]
